# Supplementary material
Source: MDPI journal article supplement (https://www.mdpi.com/1424-2818/11/8/123)
Supplement: s1 [file s1]

**Table S1.** Summary of sampling locations and years for orchid pollination data.

| Orchid                                        | Number | Location      | Year    | Plants      | Spikes      | Flowers      | Pods        |
|-----------------------------------------------|--------|---------------|---------|-------------|-------------|--------------|-------------|
| <i>Leporella fimbria</i>                      | 1      | WCA           | 2014    | na          | 107         | 75           | 31          |
| <i>Leporella fimbria</i>                      | 1      | WCA           | 2015    | na          | 86          | 139          | 41          |
| <i>Leporella fimbria</i>                      | 1      | WCA           | 2016    | na          | 64          | 101          | 40          |
| <i>Leporella fimbria</i>                      | 1      | WCA           | 2017    | na          | 171         | 285          | 81          |
| <i>Leporella fimbria</i>                      | 1      | WCA           | 2018    | 2008        | 175         | 275          | 47          |
| <i>Eriochilus dilatatus</i>                   | 2      | WCA           | 2016    | 9           | 9           | 35           | 2           |
| <i>Eriochilus dilatatus</i>                   | 2      | WCA + others  | 2014-16 | 223         | 223         | 688          | 119         |
| <i>Pterostylis sanguinea</i>                  | 3      | WCA           | 2018    | 241         | 241         | 979          | 223         |
| <i>Pterostylis sanguinea</i>                  | 3      | Home in pots  | 2018    | 12          | 10          | 36           | 6           |
| <i>Pterostylis ectypha (nana sl)</i>          | 4      | WCA area      | 2018    | 434         | 284         | 284          | 112         |
| <i>Pheladenia deformis</i>                    | 5      | WCA           | 2016    | 43          | 35          | 35           | 0           |
| <i>Pheladenia deformis</i>                    | 5      | WCA           | 2018    | 47          | 39          | 39           | 0           |
| <i>Diuris magnifica</i>                       | 6      | WCA           | 2016    | 94          | 94          | 283          | 17          |
| <i>Diuris magnifica</i>                       | 6      | WCA           | 2017    | 123         | 123         | 504          | 5           |
| <i>Diuris magnifica</i>                       | 6      | WCA           | 2018    | 465         | 465         | 1690         | 98          |
| <i>Pyrorchis nigricans</i>                    | 7      | MCA           | 2018    | 18          | 18          | 67           | 21          |
| <i>Elythranthera brunonis</i>                 | 8      | WCA           | 2016    | 20          | 15          | 51           | 5           |
| <i>Elythranthera brunonis</i>                 | 8      | WCA           | 2018    | 27          | 20          | 35           | 8           |
| <i>Elythranthera brunonis</i>                 | 8      | MCA           | 2018    | 5           | 5           | 6            | 2           |
| <i>Caladenia flava</i>                        | 9      | WCA           | 2016    | 7           | 4           | 10           | 5           |
| <i>Caladenia flava</i>                        | 9      | WCA           | 2018    | 130         | 28          | 47           | 20          |
| <i>Caladenia latifolia</i>                    | 10     | Jandakot Park | 2016    | 59          | 19          | 43           | 12          |
| <i>Caladenia latifolia</i>                    | 10     | WCA           | 2018    | 72          | 23          | 53           | 16          |
| <i>Caladenia latifolia</i>                    | 10     | Gardens       | 2018    | 96          | 82          | 183          | 85          |
| <i>Caladenia latifolia</i>                    | 10     | Whiteman Park | 2018    | 25          | 10          | 24           | 12          |
| <i>Caladenia longicauda subsp. longicauda</i> | 11A    | WCA           | 2016    | 4           | 2           | 5            | 1           |
| <i>Caladenia longicauda subsp. calcigena</i>  | 11B    | WCA           | 2018    | 2           | 1           | 2            | 0           |
| <i>Caladenia longicauda subsp. calcigena</i>  | 11B    | Sorrento      | 2008    | na          | 4           | 7            | 2           |
| <i>Caladenia discoidea</i>                    | 12     | WCA           | 2009    | 29          | 18          | 32           | 3           |
| <i>Caladenia discoidea</i>                    | 12     | WCA           | 2016    | 11          | 11          | 29           | 4           |
| <i>Caladenia discoidea</i>                    | 12     | WCA           | 2018    | 23          | 23          | 34           | 8           |
| <i>Caladenia arenicola</i>                    | 13     | WCA           | 2009    | 81          | 19          | 49           | 6           |
| <i>Caladenia arenicola</i>                    | 13     | WCA           | 2016    | 11          | 7           | 24           | 4           |
| <i>Caladenia arenicola</i>                    | 13     | WCA           | 2017    | 9           | 9           | 14           | 2           |
| <i>Caladenia arenicola</i>                    | 13     | Star Swamp    | 2018    | 8           | 5           | 8            | 1           |
| <i>Caladenia arenicola</i>                    | 13     | WCA           | 2018    | 35          | 35          | 43           | 2           |
| <i>Caladenia arenicola</i>                    | 13     | MCA           | 2018    | 14          | 14          | 19           | 4           |
| <i>Thelymitra vulgaris</i>                    | 14     | WCA           | 2016    | 4           | 4           | 10           | 10          |
| <i>Thelymitra vulgaris</i>                    | 14     | WCA           | 2018    | 29          | 29          | 76           | 72          |
| <i>Thelymitra macrophylla</i>                 | 15     | WCA           | 2015    | 278         | 124         | 421          | 14          |
| <i>Thelymitra macrophylla</i>                 | 15     | WCA           | 2016    | 400         | 201         | 4120         | 23          |
| <i>Thelymitra macrophylla</i>                 | 15     | WCA           | 2017    | 226         | 226         | 3026         | 21          |
| <i>Thelymitra macrophylla</i>                 | 15     | WCA           | 2018    | 937         | 698         | 4574         | 221         |
| <i>Thelymitra graminea</i>                    | 16     | WCA           | 2016    | 15          | 13          | 24           | 5           |
| <i>Thelymitra graminea</i>                    | 16     | WCA           | 2018    | 66          | 64          | 240          | 40          |
| <i>Thelymitra benthamiana</i>                 | 17     | WCA           | 2017    | 12          | 12          | 26           | 25          |
| <i>Thelymitra benthamiana</i>                 | 17     | WCA           | 2018    | 76          | 38          | 79           | 71          |
| <i>Thelymitra benthamiana</i>                 | 17     | MCA           | 2018    | 23          | 23          | 54           | 51          |
| <i>Disa bracteata</i>                         | 18     | WCA           | 2017    | 13          | 13          | 308          | 193         |
| <i>Disa bracteata</i>                         | 18     | WCA           | 2018    | 26          | 26          | 821          | 486         |
| <i>Disa bracteata</i>                         | 18     | near WCA      | 2018    | 11          | 11          | 245          | 168         |
| <i>Disa bracteata</i>                         | 18     | Albany        | 2018    | 12          | 12          | 337          | 298         |
| <i>Microtis media</i>                         | 19     | WCA           | 2017    | 7           | 7           | 165          | 136         |
| <i>Microtis media</i>                         | 19     | WCA           | 2018    | 38          | 38          | 1583         | 1468        |
| <i>Microtis media</i>                         | 19     | Home          | 2018    | 17          | 17          | 857          | 803         |
| <i>Thelymitra fuscolutea</i>                  | 20     | WCA           | 2016    | 30          | 16          | 97           | 11          |
| <i>Thelymitra fuscolutea</i>                  | 20     | WCA           | 2017    | 66          | 53          | 386          | 22          |
| <i>Thelymitra fuscolutea</i>                  | 20     | WCA           | 2018    | 148         | 102         | 632          | 44          |
| <i>Pterostylis recurva</i>                    | 21     | WCA           | 2018    | 1           | 1           | 2            | 2           |
| <i>Pterostylis recurva</i>                    | 21     | MCA           | 2018    | 3           | 3           | 6            | 2           |
| <i>Leptoceras menziesii</i>                   | 22     | WCA           | 2008    | 18          | 6           | 10           | 3           |
| <b>Totals</b>                                 |        |               |         | <b>6841</b> | <b>4235</b> | <b>24332</b> | <b>5234</b> |

Notes: WCA = Warwick Conservation Area (Bushland). MCA = Marrangaroo Conservation Area
